# Supplementary material
Source: Research Square preprint supplement (doi:10.21203/rs.3.rs-9932626/v1)
Supplement: Supplementary file 1 [file 9eadafe727f23abe1d57f611.docx]

**Supplementary Information**

**The Energetics of High Temperature Oxidation and Formation Mechanisms in Binary Lanthanide Nitrides (*Ln*N)**

Pascal Uhlemann,1* W. Vance,2 M. P. Heaney,2 N. Yaw,2 C. Schreinemachers,1 P. Kegler,1 P. Höhn,3 X. Guo,2* G. Modolo,1 andG. L. Murphy1*

1*Institute of Fusion Energy & Nuclear Waste Management (IFN-2), Forschungszentrum Jülich GmbH, 52428, Jülich, Germany*

2*Alexandra Navrotsky Institute for Experimental Thermodynamics, Department of Chemistry, Washington State University, Pullman, Washington 99164, United States*

3*Max-Planck-Institute for Chemical Physics of Solids, 01187 Dresden, Germany*

*corresponding authors: Pascal Uhlemann ([p.uhlemann@fz-juelich.de](mailto:p.uhlemann@fz-juelich.de)), X. Guo (x.guo@wsu.edu) and G. L. Murphy (g.murphy@fz-juelich.de)

**Supplementary Information Note 1 – Rietveld refinement of TiO2 Rutile structure**

Supplementary Figure S1 show the Rietveld refinement of TiO2 in rutile structure used to protect the CeN for high-temperature oxide melt calorimetry experiments. The results determined from Rietveld analysis as performed in the refinement program GSAS-II1 are summarised in Table S1. The PXRD of finely ground TiO2 powder was collected on a PANalytical X’Pert PRO diffractometer in Bragg-Brentano configuration equipped with an 1D- X’Celerator detector using CuKα1,2 radiation. Measurements were performed in the range of 10° ≤ 2*θ* ≤ 100° with a step size of (2*θ*) = 0.001°.


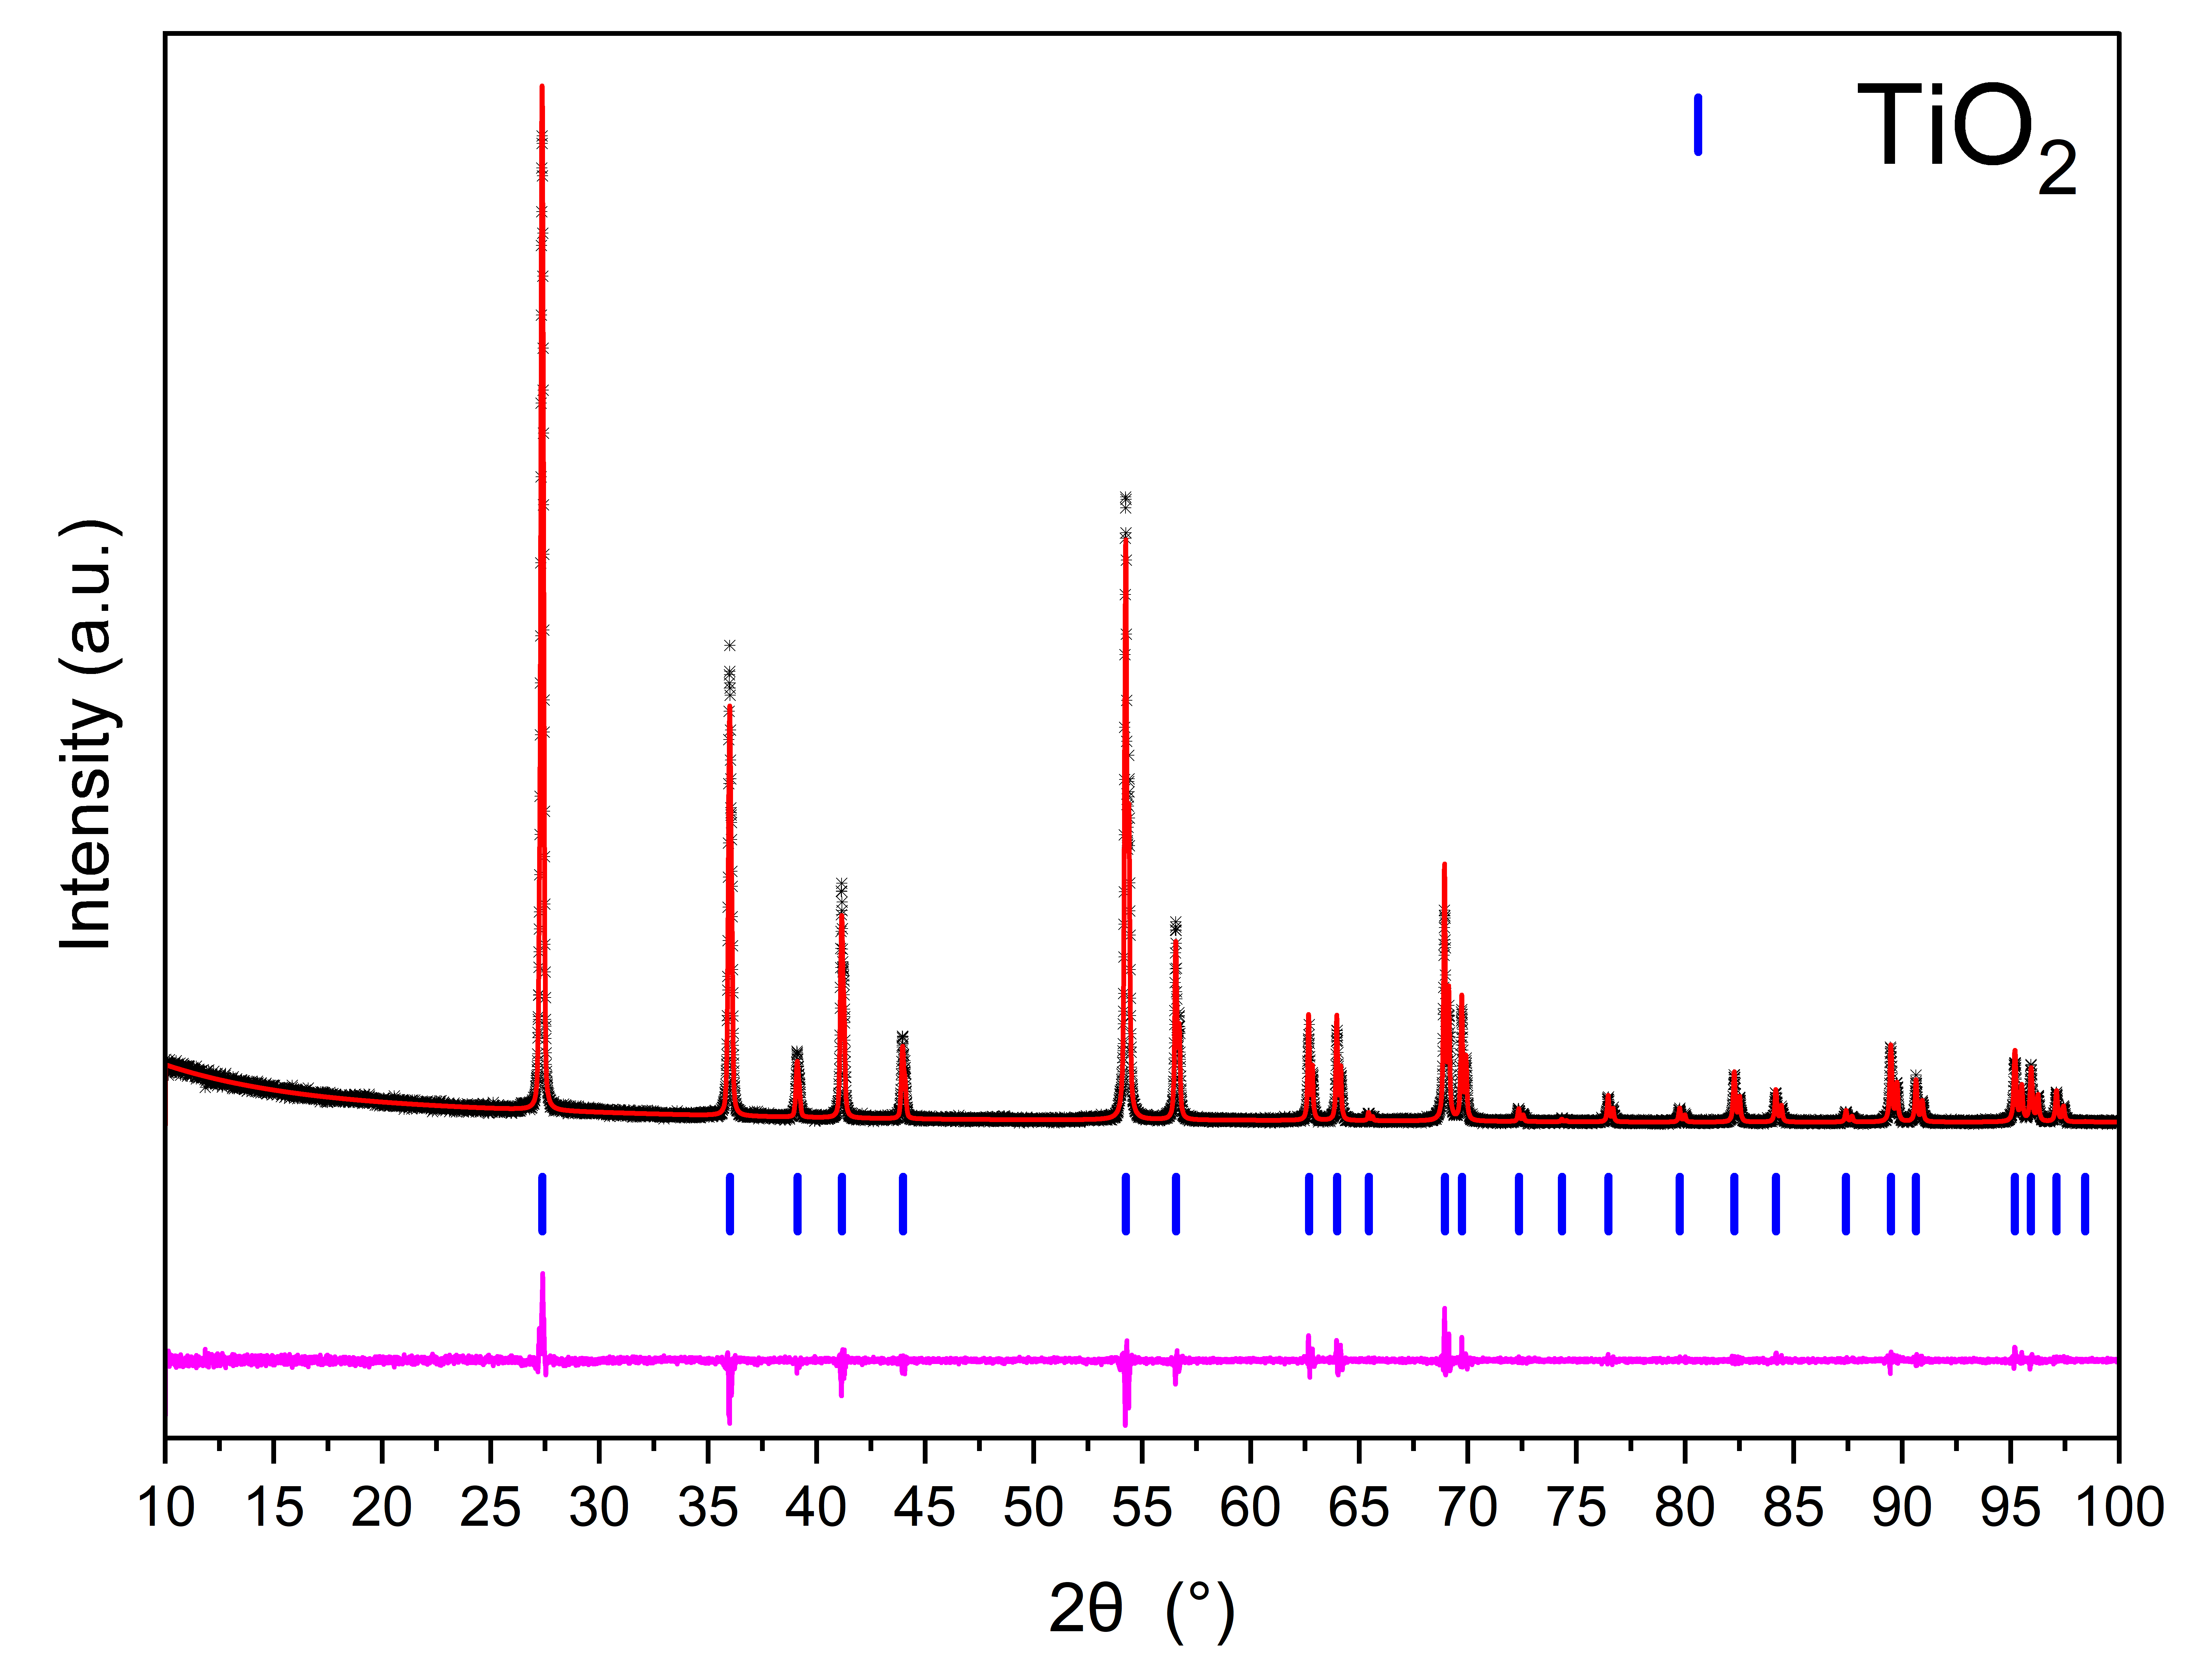


**Figure S1**. Rietveld profile of TiO2 sample in Rutile structure used to protect CeN from oxidation upfront dissolution in high temperature oxide melt calorimetry. The black crosses, red and pink lines and vertical blue respectively represent observed data, calculated profile, difference profile and allowed reflections of TiO2 crystallising in tetragonal *P*42/*mnm* structure.

**Table S1.** Refined lattice parameters determined from Rietveld refinements against PXRD data, associated fitting factors and literature lattice parameters for TiO2 in Rutile structure. Additional refinement details are shown in Supplementary Information Note 2, Table S2. Note uncertainties are reported directly from the Rietveld analysis with no correction.

| Compound | Structure and Space Group | Lattice Parameters (Å) | Fitting factors (%) | Literature lattice parameter (Å) |
| --- | --- | --- | --- | --- |
| TiO2 | *P*42/*mnm* (136) | *a* = 4.593310(18)  *c* = 2.958805(16) | R = 8.33  Rw = 11.07 | *a* = 4.59245(4)  *c* = 2.95732(3)  2 |

**Supplementary Information Note 2 – Rietveld refinement parameters**

Supplementary Table S2 summarises additional refinement details performed using Rietveld analysis with the program GSAS-II1 against the main compounds determined by PXRD measurements used in this work.

**Table S2.** Summary of additional refinement results determined from Rietveld analysis using the program GSAS-II.

| Phase | Rw-bkg (%) | Rw,min (%) | GOF |
| --- | --- | --- | --- |
| Pristine Nitride Phases, see Table 1 | | | |
| LaN | 3.47 | 3.95 | 0.88 |
| CeN | 1.60 | 1.37 | 1.17 |
| SmN | 2.81 | 3.20 | 0.88 |
| EuN | 4.84 | 1.70 | 2.84 |
| ErN | 3.83 | 1.40 | 2.73 |
| YbN | 3.95 | 1.39 | 2.85 |
| High Temperature Oxidised Phases, see Table S2 | | | |
| La2O3 | 2.57 | 1.61 | 1.60 |
| CeO2 | 3.31 | 1.61 | 2.06 |
| Sm2O3 | 2.02 | 1.63 | 1.24 |
| Eu2O3 | 2.08 | 1.63 | 1.28 |
| Er2O3 | 2.62 | 1.32 | 1.99 |
| Yb2O3 | 3.19 | 1.35 | 2.37 |
| TiO2 in Rutile structure | | | |
| TiO2 | 11.07 | 9.07 | 1.22 |

**Supplementary Information Note 3 – Enthalpies**

Supplementary Table S3 summarises additional enthalpies determined from high temperature oxide melt calorimetry measurements, as well as literature data which was used to calculate the formation enthalpies of the *Ln*N compounds. Figure S2 compares calculated formation enthalpies of the *Ln*N compounds that were measured against literature date determined via Knudsen Cell effusion mass spectrometry (KEMS).3

**Table S3**: Summary of enthalpies from literature and experimentally determined to calculate Δ*H*f°(*Ln*N). Formation enthalpies for lanthanide oxides Δ*H*f° (*Ln*2O3/*Ln*O2) and dissolution enthalpies of lanthanide oxides in sodium molybdate at 700°C Δ*H*2 were received from literature. Dissolution enthalpies for *Ln*N Δ*H*ds (*Ln*N) and oxidation enthalpies for *Ln*N at 700°C in sodium molybdate Δ*H*ox (*Ln*N) with their associated errors were experimentally determined in this investigation. All values are summarized in kJ mol-1.

| *Ln* | Δ*H*f° (*Ln*2O3/*Ln*O2) | Δ*H*2 | Δ*H*ds (*Ln*N) | 2σ(Δ*H*ds) | Δ*H*ox (*Ln*N) | σ(Δ*H*ox) | Ref |
| --- | --- | --- | --- | --- | --- | --- | --- |
| La | -1791.6 ± 2.0 | -190.70 ± 2.46 | -696.52 | 12.92 | -578.88 | 13.0 | 4,5 |
| Ce | -1090.4 ± 0.8 | 73.39 ± 1.65 | -640.08 | 7.92 | -702.05 | 8.1 | 4,5 |
| Pr | -954.2 ± 5.0 | -29.71 ± 1.35 | -674.08 | 15.31 | -632.96 | 15.4 | 6,7 |
| Nd | -1813.1 ± 0.8 | -163.36 ± 3.44 | -635.30 | 8.82 | -531.33 | 9.0 | 5,8 |
| Sm | -1823.0 ± 4.0 (m) | -153.62 ± 2.86 | -624.61 | 11.02 | -525.52 | 11.1 | 4,5 |
| Eu | -1662.5 ± 6.0 (c) | -129.24 ± 2.12 | -589.87 | 6.49 | -502.97 | 6.6 | 4,5 |
| Gd | -1854.0 ± 15.0 (c) | -148.54 ± 1.60 | -655.27 | 16.17 | -558.72 | 16.2 | 5,6 |
| Tb | -972.1 ± 5.0 | -28.132 (t) | -664.36 | 10.37 | -624.82 | 10.4 | 4,9 |
| Dy | -1863.4 ± 5.0 | -114.88 ± 2.22 | -522.17 | 12.38 | -442.44 | 12.4 | 4,5 |
| Ho | -1883.3 ± 8.2 | -111.72 ± 3.68 | -502.05 | 3.98 | -423.90 | 4.4 | 4,5 |
| Er | -1900.1 ± 6.5 | -105.26 ± 2.48 | -457.99 | 15.96 | -383.07 | 16.0 | 4,5 |
| Tm | -1889.3 ± 5.7 | -97.12 ± 2.38 | -525.67 | 10.89 | -454.83 | 11.0 | 4,5 |
| Yb | -1814.5 ± 6.0 | -98.46 ± 3.18 | -449.68 | 6.77 | -378.17 | 7.0 | 4,5 |
| Lu | -1877.0 ± 7.7 | -96.90 ± 1.90 | -459.52 | 0.70 | -388.79 | 1.2 | 4,5 |

(c) cubic structure, (m) monoclinic structure, (t) theoretical calculated value


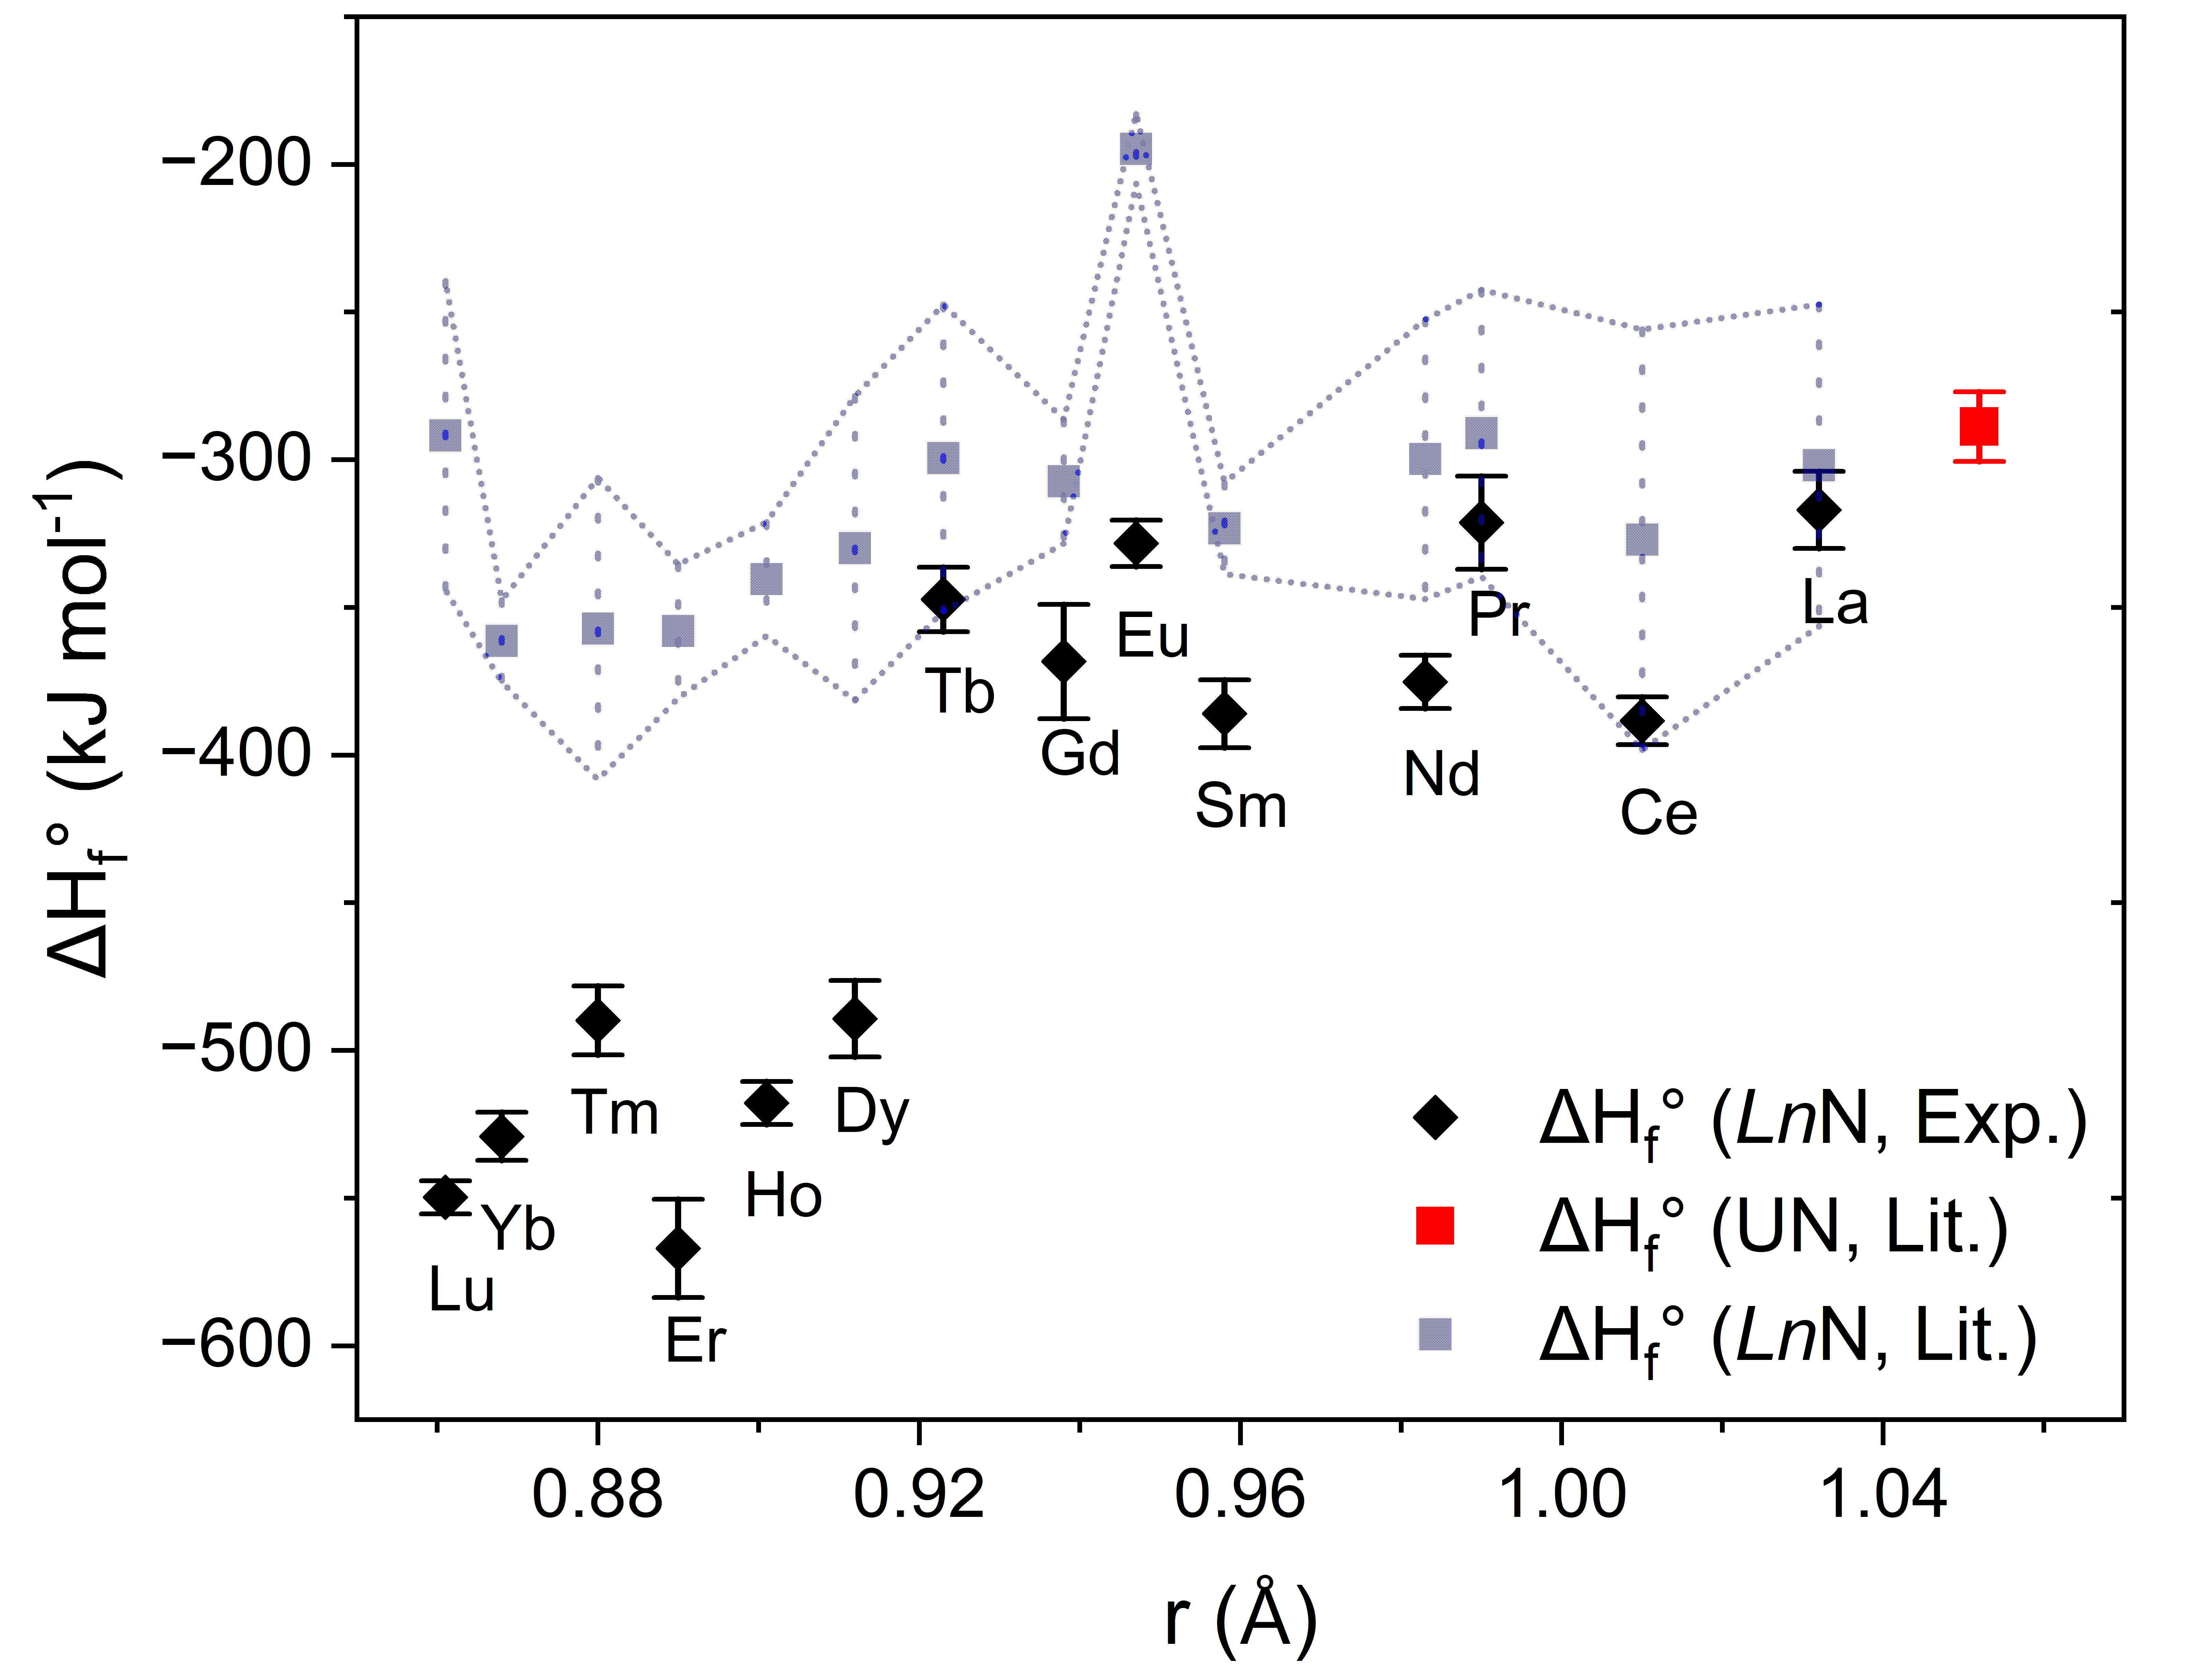


**Figure S2.** Experimentally determined Δ*H*f° for *Ln*N compounds where *Ln* = La, Ce, Pr, Nd, Sm, Eu, Gd, Tb, Dy, Ho, Er, Tm, Yb and Lu plotted against the ionic radii r of the *Ln*3+ cation in 6-fold coordination and comparison against literature formation enthalpies Δ*H*f° based on KEMS measurements.3 The literature value for the Δ*H*f° of UN was determined by the same methodology is plotted for highlighting the trend of Δ*H*f° against r.10

**Supplementary Information Note 4 – Gibbs energies**

Supplementary Table S4 summarises additional enthalpies and entropies from literature data which were used to calculate the Gibbs energies of formation and oxidation of *Ln*N and UN. The literature data of entropies for *Ln*N is scarce and data was solely derived for LaN and CeN, which was applied for calculation of the thermodynamic data of all the other *Ln*N. Supplementary Table S5 summarises reaction enthalpies and entropies calculated prior to the Gibbs energies of formation and oxidation.

**Table S4**: Summary of literature entropy data for *Ln* metals, *Ln* oxides, *Ln* hydroxides and *Ln*N, in addition to the formation enthalpy and entropies of UN, UO2, H2O, NH3 and H2 used to calculate Δ*G*f°, Δ*G*ox° and Δ*G*hyd° at 298.15 K.

| Compound | Δ*H*f° (kJ mol-1) | S°(J mol-1 K-1) | Ref |
| --- | --- | --- | --- |
| LaN |  | 44.350 | 9 |
| La2O3 |  | 127.32 ± 0.84 | 11 |
| La(OH)3 | -1416.1 | 117.81 | 12 |
| La |  | 56.902 | 9 |
| CeN |  | 44.350 | 9 |
| CeO2 |  | 62.29 ± 0.07 | 13 |
| Ce(OH)3 | -1416.1 | 129.40 | 12 |
| Ce |  | 69.454 | 9 |
| PrO2 |  | 80.80 ± 2.00 | 14 |
| Pr |  | 73.931 | 9 |
| Pr(OH)3 | -1413.8 | 131.70 | 12 |
| Nd2O3 |  | 158.70 ± 1.00 | 11 |
| Nd(OH)3 | -1415.6 | 129.87 | 12 |
| Nd |  | 71.086 | 9 |
| Sm2O3(m) |  | 150.60 ± 0.30 | 15 |
| Sm(OH)3 | -1406.6 | 125.80 | 12 |
| Sm |  | 69.496 | 9 |
| Eu2O3(m) |  | 143.50 ± 0.50 | 16 |
| Eu(OH)3 | -1319.1 | 119.88 | 12 |
| Eu |  | 77.822 | 9 |
| Gd2O3(m) |  | 157.10 ± 0.20 | 17 |
| Gd(OH)3 | -1408.9 | 126.63 | 12 |
| Gd |  | 67.948 | 9 |
| TbO2 |  | 86.90 ± 3.00 | 14 |
| Tb(OH)3 | -1414.8 | 128.37 | 12 |
| Tb |  | 73.304 | 9 |
| Dy2O3 |  | 149.80 ± 0.15 | 18 |
| Dy(OH)3 | -1428.4 | 130.30 | 12 |
| Dy |  | 74.894 | 9 |
| Ho2O3 |  | 156.38 ± 0.15 | 18 |
| Ho(OH)3 | -1431.1 | 130.04 | 12 |
| Ho |  | 75.019 | 9 |
| Er2O3 |  | 153.13 ± 0.15 | 18 |
| Er(OH)3 | -1432.5 | 128.60 | 12 |
| Er |  | 73.178 | 9 |
| Tm2O3 |  | 139.70 ± 0.40 | 19 |
| Tm(OH)3 | -1421.1 | 126.50 | 12 |
| Tm |  | 74.015 | 9 |
| Yb2O3 |  | 133.10 ± 0.30 | 15 |
| Yb(OH)3 | -1395.5 | 118.60 | 12 |
| Yb |  | 59.831 | 9 |
| Lu2O3 |  | 109.96 ± 0.13 | 19 |
| Lu(OH)3 | -1427.0 |  | 20 |
| Lu |  | 50.961 | 9 |
| UN | -288.8 ± 5.9 | 62.22 | 10,21 |
| UO2 | -1084.9 ± 1.0 | 77.03 ± 0.20 | 22,23 |
| U |  | 50.292 | 9 |
| H2O(g) | -241.8 | 192.77 ± 0.05 | 23 |
| NH3 | -45.9 | 188.84 ± 0.01 | 23 |
| H2 |  | 130.68 ± 0.003 | 23 |

m = monoclinic, g = gaseous

**Table S5**: Summary of calculated reaction formation entropies Δ*S*rct,f°, reaction oxidation enthalpies Δ*H*rct,ox° and entropies Δ*S*rct,ox°, and reaction hydrolysis Δ*H*rct,hdy° and entropies Δ*S*rct,hyd°, used to calculate Δ*G*f°, Δ*G*ox° and Δ*G*hyd° at 298 K.

| Element | Δ*S*rct,f° (J mol-1 K-1) | Δ*H*rct,ox° (kJ mol-1) | Δ*S*rct,ox° (J mol-1 K-1) | Δ*H*rct,hyd° (kJ mol-1) | Δ*S*rct,hyd° (J mol-1 K-1) |
| --- | --- | --- | --- | --- | --- |
| La | -43.66 | -584.86 | -38.75 | -300.28 | -330.12 |
| Ce | -56.21 | -713.47 | -91.41 | -288.69 | -262.14 |
| Pr | -60.69 | -644.37 | -72.90 | -286.39 | -327.63 |
| Nd | -57.84 | -537.31 | -23.06 | -288.22 | -274.91 |
| Sm | -56.25 | -531.50 | -27.11 | -292.29 | -253.94 |
| Eu | -64.58 | -502.90 | -30.66 | -298.21 | -222.37 |
| Gd | -54.71 | -547.55 | -23.86 | -291.46 | -274.18 |
| Tb | -60.06 | -625.36 | -66.80 | -289.72 | -301.60 |
| Dy | -61.65 | -448.42 | -27.51 | -287.79 | -173.80 |
| Ho | -61.78 | -429.88 | -24.22 | -288.05 | -147.93 |
| Er | -59.94 | -389.05 | -25.84 | -289.49 | -99.67 |
| Tm | -60.77 | -460.81 | -32.56 | -291.59 | -164.80 |
| Yb | -46.59 | -384.15 | -35.86 | -299.49 | -97.59 |
| Lu | -37.72 | -394.77 | -47.43 | -291.59 | -110.81 |
| U | -19.18 | -807.53 | -94.53 | -104.75 | -327.17 |

**References**

1 Toby, B. H. & Dreele, R. B. v. GSAS-II: the genesis of a modern open-source all purpose crystallography software package. *Journal of Applied Crystallography* **46**, 544–549 (2013). <https://doi.org:10.1107/s0021889813003531>

2 Huang, H. *et al.* Structural, Magnetic, and Electronic Properties of the Cr1-*x*TixO2 Solid. *Inorganic Chemistry* **61**, 1391–1400 (2022). <https://doi.org:10.1021/acs.inorgchem.1c02923>

3 Kordis, J. & Gingerich, K. A. Heats of vaporization and standard heats of formation of rare earth mononitrides. *Journal of Nuclear Materials* **66**, 197–199 (1977). <https://doi.org:10.1016/0022-3115(77)90147-7>

4 Cordfunke, E. H. P. & Konings, R. J. M. The enthalpies of formation of lanthanide compounds. *Thermochimica Acta* **375**, 65–79 (2001). <https://doi.org:10.1016/s0040-6031(01)00510-x>

5 Ushakov, S. V., Helean, K. B., Navrotsky, A. & Boatner, L. A. Thermochemistry of rare-earth orthophosphates. *Journal of Materials Research* **16**, 2623–2633 (2001). <https://doi.org:10.1557/jmr.2001.0361>

6 Morss, L. R. & Konings, R. J. M. in *Binary Rare Earth Oxides* (eds G. Adachi, N. Imanaka, & Z. C. Kang) 163–188 (Springer Netherlands, 2004).

7 Ushakov, S. V., Cheng, J., Navrotsky, A., Wu, J. R. & Haile, S. M. Formation Enthalpies of Tetravalent Lanthanide Perovskites by High Temperature Oxide Melt Solution Calorimetry. *MRS Proceedings* **718** (2002). <https://doi.org:10.1557/proc-718-d7.17>

8 Huntelaar, M. E. *et al.* The thermodynamic properties of Ce2O3(s) fromT→ 0 K to 1500 K. *The Journal of Chemical Thermodynamics* **32**, 465–482 (2000). <https://doi.org:10.1006/jcht.1999.0614>

9 Barin, I. *Thermochemical Data of Pure Substances*. (Wiley, 1995).

10 Goncharov, V. G. *et al.* Energetics of oxidation and formation of uranium mononitride. *Journal of Nuclear Materials* **569**, 153904 (2022). <https://doi.org:10.1016/j.jnucmat.2022.153904>

11 Justice, B. H. & Westrum, E. F. Thermophysical properties of the lanthanide oxides. I. Heat capacities, thermodynamic properties, and some energy levels of Lanthanum(III) and Neodymium(III) oxides from 5 to 350K. *The Journal of Physical Chemistry* **67**, 339–345 (1963). <https://doi.org:10.1021/j100796a031>

12 Diakonov, I. I., Ragnarsdottir, K. V. & Tagirov, B. R. Standard thermodynamic properties and heat capacity equations of rare earth hydroxides. *Chemical Geology* **151**, 327–347 (1998). <https://doi.org:10.1016/s0009-2541(98)00088-6>

13 Westrum, E. F. & Beale, A. F. Heat capacities and Chemical Thermodynamics of Cerium(III) Flouride and of Cerium(IV) Oxide from 5 to 300°K. *The Journal of Physical Chemistry* **65**, 353–355 (1961). <https://doi.org:10.1021/j100820a041>

14 Konings, R. J. M. *et al.* The Thermodynamic Properties of the f -Elements and their Compounds. Part 2. The Lanthanide and Actinide Oxides. *Journal of Physical and Chemical Reference Data* **43** (2014). <https://doi.org:10.1063/1.4825256>

15 Justice, B. H. & Westrum, E. F. Thermophysical properties of the lanthanide oxides. II. Heat capacities, thermodynamic properties, and some energy levels of Samarium(III), Gadolinium(III), and Ytterbium(III) oxides from 10 to 350°K. *The Journal of Physical Chemistry* **67**, 345–351 (1963). <https://doi.org:10.1021/j100796a032>

16 Lyutsareva, N. S., Berezovskii, G. A. & Paukov, I. E. Heat Capacity of Two Modifications of Eu2O3 with a Range of 8–300 K. *Zh. Fiz. Khim* **68**, 1179–1182 (1994).

17 Konings, R. J. M., van Miltenburg, J. C. & van Genderen, A. C. G. Heat capacity and entropy of monoclinic Gd2O3. *The Journal of Chemical Thermodynamics* **37**, 1219–1225 (2005). <https://doi.org:10.1016/j.jct.2005.02.014>

18 Westrum, E. F. & Justice, B. H. Thermophysical properties of the lanthanide oxides. III. Heat capacities, thermodynamic properties, and some energy levels of Dysprosium(III), Holmium(III) and Erbium(III) oxides. *The Journal of Physical Chemistry* **67**, 659–665 (1963). <https://doi.org:10.1021/j100797a029>

19 Justice, B. H., Westrum, E. F., Chang, E. & Radebaugh, R. Thermophysical properties of the lanthanide oxides. IV. Heat capacities and thermodynamic properties of thulium(III) and lutetium(III) oxides. Electronic energy levels of several lanthanide(III) ions. *The Journal of Physical Chemistry* **73**, 333–340 (1969). <https://doi.org:10.1021/j100722a010>

20 Alvero, R., Bernal, A., Carrizosa, I., Odriozola, J. A. & Trillo, J. M. Lanthanide oxides: Thermochemical approach to hydration. *Journal of Materials Science* **22**, 1517–1520 (1987). <https://doi.org:10.1007/bf01233156>

21 Counsell, J. F., Dell, R. M. & Martin, J. F. Thermodynamic properties of uranium compounds. Part 2.—Low-temperature heat capacity and entropy of three uranium nitrides. *Trans. Faraday Soc.* **62**, 1736–1747 (1966). <https://doi.org:10.1039/tf9666201736>

22 Robie, R. A. & Hemingway, B. S. *Thermodynamic properties of minerals and related substances at 298.15 K and 1 bar (105 pascals) pressure and at higher temperatures* (1995).

23 Cox, J. D., Wagman, D. D., & Medvedev, V. A. *CODATA Key Values for Thermodynamics*. (1989).
